# Supplementary material
Source: publisher figshare collection journal article supplement (https://frontiersin.figshare.com/ndownloader/files/27728079)
Supplement: Supplementary file [file 27728079]

1 **Supplementary Information**

2

3 **OXIDATIVE STRESS, INFLAMMATION AND ACTIVATORS OF MITOCHONDRIAL**  
4 **BIOGENESIS: TEMPOL TARGETS IN THE DIAPHRAGM MUSCLE OF EXERCISE**  
5 **TRAINED-MDX MICE**

6

7 Heloína Nathalliê Mariano da Silva<sup>1</sup>, MSc, Caroline Covatti<sup>1</sup>, MSc, Guilherme Luiz da Rocha<sup>1</sup>,  
8 MSc, Daniela Sayuri Mizobuti<sup>1</sup>, MSc, Rafael Dias Mâncio<sup>1</sup>, PhD, Túlio de Almeida Hermes<sup>1</sup>, PhD,  
9 Larissa Akemi Kido<sup>1</sup>, PhD, Valéria Helena Alves Cagnon<sup>1</sup>, PhD, Elaine Cristina Leite Pereira<sup>1,2</sup>,  
10 PhD, and Elaine Minatel<sup>1\*</sup>, PhD

11

12 <sup>1</sup> Department of Structural and Functional Biology, Institute of Biology, State University of  
13 Campinas (UNICAMP), Campinas, São Paulo 13083-970, Brazil.

14 <sup>2</sup> University of Brasília (UnB), Faculty of Ceilândia, Brasília, Distrito Federal, 72220-275, Brazil.

15

16

17

18

19

20

**Supplementary Figure 1S. Tempol effects on forelimb muscle strength**

Representative forelimb muscle strength, assessed by taking measurements of force at time points Start and End, in the 7 animals from each experimental group: (A) sedentary *mdx* mice (*mdxSed*), (B) exercise trained *mdx* mice (*mdxEx*) and (C) exercise trained *mdx* mice treated with Tempol (*mdxEx+T*).

**Supplementary Figure 2S. Tempol effects on regenerative muscular process (fibers which central nuclei) and on inflammatory response morphology (inflammatory area)**

Representative diaphragm (DIA) cross-sections showing fibers which central nuclei (black arrowheads) and the inflammatory area (outline indicates the representative area) in the 7 animals from each experimental group: sedentary *mdx* mice (*mdxSed*), exercise trained *mdx* mice (*mdxEx*) and exercise trained *mdx* mice treated with Tempol (*mdxEx+T*).

**Supplementary Figure 3S. Tempol effects on inflammatory response morphology (macrophage infiltration)**

Representative diaphragm (DIA) cross-sections showing the macrophage infiltration (white arrowheads) in the 7 animals from each experimental group: sedentary *mdx* mice (*mdxSed*), exercise trained *mdx* mice (*mdxEx*) and exercise trained *mdx* mice treated with Tempol (*mdxEx+T*).

**Supplementary Figure 4S. Tempol effects on oxidative stress markers (DHE)**

Representative diaphragm (DIA) cross-sections showing the dihydroethidium (DHE) fluorescence in the 7 animals from each experimental group: sedentary *mdx* mice (*mdxSed*), exercise trained *mdx* mice (*mdxEx*) and exercise trained *mdx* mice treated with Tempol (*mdxEx+T*).

45 **Supplementary Figure 5S. Tempol effects on oxidative stress markers (Lipofuscin granules)**

46 Representative diaphragm (DIA) cross-sections showing the autofluorescent lipofuscin granules  
47 (white arrowheads) in the 7 animals from each experimental group: sedentary *mdx* mice (*mdxSed*),  
48 exercise trained *mdx* mice (*mdxEx*) and exercise trained *mdx* mice treated with Tempol (*mdxEx+T*).

49

50 **Supplementary Figure 6S. Tempol effects on inflammatory markers (TNF- $\alpha$  and NF- $\kappa$ B)**

51 (A) Representative membranes stained with Ponceau of the different bands shown in this paper. (B)  
52 Representative bands analyzed for the tumor necrosis factor-alpha (TNF- $\alpha$ ), nuclear factor kappa B  
53 (NF- $\kappa$ B) and  $\beta$ -actin quantified by western blotting from the different experimental groups: sedentary  
54 *mdx* mice (*mdxSed*), exercise trained *mdx* mice (*mdxEx*) and exercise trained *mdx* mice treated with  
55 Tempol (*mdxEx+T*). The images in Figure 4B represent one animal per group in sequence (n=7  
56 animals per group).

57

58 **Supplementary Figure 7S. Tempol effects on oxidative stress markers (4-HNE)**

59 (A) Representative membranes stained with Ponceau of the different bands shown in this paper. (B)  
60 Representative bands analyzed for the 4-hydroxynonenal (4-HNE)-protein adducts and  $\beta$ -actin  
61 quantified by western blotting from the different experimental groups: sedentary *mdx* mice (*mdxSed*),  
62 exercise trained *mdx* mice (*mdxEx*) and exercise trained *mdx* mice treated with Tempol (*mdxEx+T*).  
63 The images in Figure 7B represent one animal per group in sequence (n=7 animals per group).

64

**Supplementary Figure 8S. Tempol effects on antioxidant system levels (CAT, SOD2, GPx1 and GR)**

(A) Representative membranes stained with Ponceau of the different bands shown in this paper. (B) Representative bands analyzed for the catalase (CAT), manganese-superoxide dismutase (SOD2), glutathione peroxidase (GPx1), glutathione reductase (GR) and  $\beta$ -actin quantified by western blotting from the different experimental groups: sedentary *mdx* mice (*mdxSed*), exercise trained *mdx* mice (*mdxEx*) and exercise trained *mdx* mice treated with Tempol (*mdxEx+T*). The images in Figure 8B represent one animal per group in sequence (n=7 animals per group).

73

**Supplementary Figure 9S. Tempol effects on VEGF factor**

(A) Representative membranes stained with Ponceau of the different bands shown in this paper. (B) Representative bands analyzed for vascular endothelial growth factor (VEGF) and  $\beta$ -actin quantified by western blotting from the different experimental groups: sedentary *mdx* mice (*mdxSed*), exercise trained *mdx* mice (*mdxEx*) and exercise trained *mdx* mice treated with Tempol (*mdxEx+T*). The images in Figure 9B represent one animal per group in sequence (n=7 animals per group).

80

**Supplementary Figure 10S. Tempol effects on activators of mitochondrial biogenesis and oxidative phosphorylation**

(A) Representative membranes stained with Ponceau of the different bands shown in this paper. (B) Representative bands analyzed for peroxisome proliferator-activated receptor  $\delta$  (PPAR $\delta$ ) and peroxisome proliferator-activated receptor- $\gamma$  coactivator-1 $\alpha$  (PGC-1 $\alpha$ ) and  $\beta$ -actin quantified by western blotting from the different experimental groups: sedentary *mdx* mice (*mdxSed*), exercise

87 trained *mdx* mice (*mdxEx*) and exercise trained *mdx* mice treated with Tempol (*mdxEx*+T). The  
88 images in Figure 10B represent one animal per group in sequence (n=7 animals per group).

89

90 **Supplementary Figure 11S. Tempol effects on activators of mitochondrial biogenesis and**  
91 **oxidative phosphorylation**

92 (A) Representative membranes stained with Ponceau of the different bands shown in this paper. (B)  
93 Representative bands analyzed for OXPHOS complexes (complex V, III, IV, II and I) and  $\beta$ -actin  
94 quantified by western blotting from the different experimental groups: sedentary *mdx* mice (*mdxSed*),  
95 exercise trained *mdx* mice (*mdxEx*) and exercise trained *mdx* mice treated with Tempol (*mdxEx*+T).  
96 The images in Figure 10B represent one animal per group in sequence (n=7 animals per group).
